# Supplementary material for: Mutational Screening of Skeletal Genes in 14 Chinese Children with Osteogenesis Imperfecta Using Targeted Sequencing
Source: Hindawi journal article supplement (doi:10.1155/2022/5068523), 2022-05-19
Supplement: f1 [file 5068523.f1.docx]

**Supplementary Table S1 225 genes included in the skeletal gene panel.**

| *ACAN* | *ACP5* | *ACVR1* | *ADAMTSL2* | *AGA* | *AGPS* | *TMEM38B* |
| --- | --- | --- | --- | --- | --- | --- |
| *ALX1* | *ALX3* | *ALX4* | *ANKH* | *ANO5* | *ANTXR2* | *TMEM5* |
| *ARSE* | *B4GALT7* | *BMP1* | *BMP2* | *BMPER* | *BMPR1B* | *TMEM67* |
| *CANT1* | *CASR* | *CC2D2A* | *CDH3* | *CEP290* | *CHST14* | *TNFRSF11A* |
| *CLCN5* | *CLCN7* | *COG1* | *COL10A1* | *COL11A1* | *COL11A2* | *TNFRSF11B* |
| *COL1A2* | *COL2A1* | *COL9A1* | *COL9A2* | *COL9A3* | *COMP* | *TNFSF11* |
| *CRTAP* | *CTSA* | *CTSK* | *CUL7* | *DDR2* | *DHCR24* | *TNNI2* |
| *DLL3* | *DLX3* | *DMP1* | *DYM* | *DYNC2H1* | *EBP* | *TNNT3* |
| *EIF2AK3* | *ENPP1* | *EP300* | *ESCO2* | *EVC* | *EVC2* | *TNXB* |
| *EXT2* | *FAM20C* | *FAM58A* | *FBLN1* | *FBN1* | *FBN2* | *TP63* |
| *FERMT3* | *FGF10* | *FGF23* | *FGF9* | *FGFR1* | *FGFR2* | *TPM2* |
| *FKBP10* | *FLNA* | *FLNB* | *FMN1* | *FUCA1* | *GALNS* | *TRAPPC2* |
| *GDF5* | *GDF6* | *GJA1* | *GLB1* | *GLI3* | *GNAS* | *TREM2* |
| *GNPTG* | *GNS* | *GORAB* | *GPC6* | *GREM1* | *GUSB* | *TRIP11* |
| *HES7* | *HGSNAT* | *HOXA11* | *HOXA13* | *HOXD13* | *HPGD* | *TRPM6* |
| *ICK* | *IDS* | *IDUA* | *IFITM5* | *IFT122* | *IFT80* | *TRPS1* |
| *IL1RN* | *LBR* | *LEMD3* | *LFNG* | *LIFR* | *LMBR1* | *TRPS1* |
| *LMX1B* | *LPIN2* | *LRP4* | *LRP5* | *MAN2B1* | *MAN2C1* | *TRPV4* |
| *MESP2* | *MGP* | *MKS1* | *MMP13* | *MMP2* | *MMP9* | *TTC21B* |
| *MSX2* | *MYCN* | *NAGLU* | *NEK1* | *NEU1* | *NF1* | *TWIST1* |
| *NIPBL* | *NKX3-2* | *NLRP3* | *NOG* | *NPPC* | *NPR2* | *TYROBP* |
| *NSDHL* | *OBSL1* | *OFD1* | *OSTM1* | *P3H1* | *PAPSS2* | *VCP* |
| *PEX7* | *PHEX* | *PIGV* | *PITX1* | *PLEKHM1* | *PLOD2* | *VDR* |
| *POLR1D* | *POR* | *PPIB* | *PTH1R* | *PTHLH* | *PTPN11* | *VPS13B* |
| *RASGRP2* | *RECQL4* | *ROR2* | *RPGRIP1L* | *RUNX2* | *SALL1* | *WDR19* |
| *SBDS* | *SERPINF1* | *SERPINH1* | *SH3BP2* | *SH3PXD2B* | *SHH* | *WDR35* |
| *SLC17A5* | *SLC26A2* | *SLC34A3* | *SLC35D1* | *SLC39A13* | *SLCO5A1* | *WISP3* |
| *SOST* | *SOX9* | *SP7* | *SULF1* | *SUMF1* | *TBCE* | *WNT1* |
| *TBX3* | *TBX4* | *TBX5* | *TBXAS1* | *TCIRG1* | *TCOF1* | *WNT10B* |
| *TGFBR1* | *TGFBR2* | *THPO* | *TMEM38B* | *TMEM67* | *TNFRSF11A* | *WNT3* |
| *TNFSF11* | *TP63* | *TRAPPC2* | *TREM2* | *TRIP11* | *TRPS1* | *WNT7A* |
| *TWIST1* | *TYROBP* | *WDR35* | *WISP3* | *WNT1* | *WNT3* | *WRN* |
| *ZMPSTE24* |  |  |  |  |  |  |
